# Supplementary material for: Sex-Specific Neural Networks of Cued Threat Conditioning: A Pilot Study
Source: Front Syst Neurosci. 2022 May 17;16:832484. doi: 10.3389/fnsys.2022.832484 (PMC9152023; doi:10.3389/fnsys.2022.832484)
Supplement: Supplementary file 3 [file Table_2.XLSX]

## Sheet: Table S2 Group Data
	# OF SECTIONS QUANTIFIED	MEAN				STANDARD ERROR OF THE MEAN				N/GROUP
REGION		NAÏVE MALE	NAÏVE FEMALE	TRAINED MALE	TRAINED FEMALE	NAÏVE MALE	NAÏVE FEMALE	TRAINED MALE	TRAINED FEMALE	NAÏVE MALE	NAÏVE FEMALE	TRAINED MALE	TRAINED FEMALE
AAA	1-2	4.15	1.125	11	10.75	2.08956	0.314576	3.32916	1.83144	5	4	3	4
ACAd	9-13	5.07778	1.95486	18.5741	19.2847	2.24779	0.587463	6.57853	2.72215	5	4	3	4
ACAv	6-9	8.3875	3.98698	28.7222	34.7656	3.54126	0.870622	8.47414	2.61479	5	4	3	4
ACB	3-6	9.375	3.625	51.0417	39.375	3.31704	0.5	11.7492	9.02687	5	5	3	4
AD	2-4	0.675	0.09375	0.375	1.04167	0.3	0.09375	0.216506	0.410369	5	4	3	4
AHN	1-3	5.75	1.95	23.25	22.3958	0.833333	1.14673	4.88834	2.73171	5	5	3	4
AId	4-8	1.40556	0.375	5.02778	3.70833	0.469239	0.10412	0.486706	1.59081	5	5	3	4
AIp	3-7	2.05	0.822917	6.69444	7.125	0.598829	0.189037	0.95541	0.709512	5	5	3	4
AIv	3-6	2.81667	0.825	12.9861	8.78125	1.13946	0.311359	3.05962	1.07937	5	5	3	4
AM	1-3	0.966667	0.5	2.83333	4.54167	0.386041	0.158114	2.58736	2.18859	5	5	3	4
AON	1-3	18.15	7.05	63.5	60	5.28299	1.12194	6.3705	14.6156	5	5	3	4
APN	1-2	5.95	4.41667	2.41667	12.875	2.3	0.784396	0.740683	5.83318	5	5	3	4
AUDd	4-6	4.89583	4.05556	18	28.375	1.59403	0.867494	1.12114	12.4192	4	5	3	3
AUDp	4-6	11.5417	9.85556	36.6667	34.1528	4.6028	2.12855	6.11824	10.8906	4	5	3	3
AUDv	5-8	7.59375	5.99167	26.2708	25.8819	1.85203	1.78152	7.99783	7.70022	4	5	3	3
AV	1-3	0.166667	0.15	1.33333	3.45833	0.105409	0.1	0.881917	1.49594	5	5	3	4
BLA	5-8	5.28646	3.35417	19.75	24.4757	1.51477	0.540825	2.68774	3.60957	4	5	3	3
BMA	6-10	3.375	2.0625	16.8583	21.3861	1.0615	0.469652	2.08468	2.99422	4	4	3	3
BSTal	1-3	2.03333	0.875	6.69444	5.60417	0.690008	0.375	0.486706	1.16834	5	5	3	4
BSTam	1-3	4.58333	3.18333	15.5556	21.7083	1.36117	0.740402	1.35173	7.62864	5	5	3	4
BSTov	1-2	0.7	0.75	4.25	4.6875	0.254951	0.111803	0.901388	2.2041	5	5	3	4
CEA	2-4	7.725	2.225	23.875	34.2396	2.40014	0.419076	4.31627	5.83371	5	5	3	4
CL	1-2	0	0.3	0.666667	0.1875	0	0.2	0.666667	0.119678	5	5	3	4
CLA	6-9	2.525	0.635417	9.46528	6.85417	0.887348	0.0420985	1.47737	1.05158	5	4	3	4
COA	6-10	5.075	1.94167	17.9167	26.9694	1.16105	0.261805	3.35836	4.64059	4	4	3	3
CP	9-12	9.44792	3.11458	21.7824	25.7685	2.83389	0.592395	10.4183	6.58242	4	4	3	3
dCA1	2-5	3.90625	2.46667	6.9375	11.125	1.6229	1.21838	4.68667	1.12731	4	5	3	3
dCA2	2-5	1.09375	0.625	1.89583	1.83333	0.386541	0.142522	1.37231	0.208333	4	5	3	3
dCA3	2-5	9.46875	5.65	14.0417	17.0833	3.28125	1.15475	4.456	4.38115	4	5	3	3
dDG	2-5	12.9062	11.5167	14.3958	19.8333	2.09251	2.60364	2.51566	3.81631	4	5	3	3
DMH	1-2	10.45	9.25	43.9167	52.0625	3.11087	4.07354	12.2103	17.9712	5	5	3	4
DP	1-3	2.5	0.95	9.75	17.5	1.22814	0.339116	4.91808	1.8143	5	5	3	4
ECT	5-9	4.34375	2.225	15.375	18.9896	1.24648	0.708499	4.74767	4.99428	4	5	3	3
ENTl	4-7	4.79167	4.22778	20.9306	16.5093	1.55624	0.777301	10.0559	1.55037	4	5	3	3
EP	11-17	4.16369	1.57292	11.869	13.2222	1.1588	0.150984	2.0964	1.46779	4	4	3	3
EW	1-2	2.71667	2.4	2.5	1	1.14976	1.11411	0.144338	0.841625	5	5	3	4
GP	4-6	0.633333	0.0625	0.777778	3.40972	0.309121	0.0625	0.454742	1.51359	5	4	3	4
GU	6-8	1.32222	0.2	3.52778	2.375	0.394073	0.0731774	0.572204	1.08206	5	5	3	4
ILA	3-5	11.3167	5.55833	58.1389	43.1875	2.7677	0.92408	10.1657	11.6823	5	5	3	4
IMD	2-4	0.59375	0.725	4.41667	3.54167	0.303517	0.356634	2.64608	0.600925	4	5	3	3
IPN	1-2	1.7	0.95	0.833333	4.5	1.4543	0.61441	0.506897	1.59426	5	5	3	4
LA	2-5	3.875	2.74167	12.1875	17.1667	0.81809	0.174005	2.56656	1.97027	4	5	3	3
LD	2-4	0.683333	0.45	1.41667	1.25	0.364577	0.134629	0.820738	0.579601	5	5	3	4
LG	2-5	9	8.5	11.3056	19.5	1.19461	1.63602	0.481926	5.66973	4	5	3	3
LHA	3-6	19.4583	13.0833	70.5926	74.287	4.37831	3.31317	1.03716	3.81242	4	5	3	3
LP	2-5	1.96875	2.58333	3.36111	7.95833	0.974112	0.959691	0.988748	2.40262	4	5	3	3
LSc	4-5	3.46667	1.1125	8.33333	14.4167	1.17463	0.301587	2.26282	5.9587	5	5	3	4
LSr	5-8	15.6167	9	95.8611	78.2708	3.44913	2.43667	23.4183	16.5279	5	5	3	4
LSv	1-2	4.75	2.2	25.3333	39.3125	1.0247	0.860233	8.76705	11.6572	5	5	3	4
MA	1-2	1.1	0.25	1.75	1.79167	0.407738	0.111803	0.946485	0.578852	5	5	3	4
MEA	3-6	6.375	4.83333	47.1667	43.3796	2.58591	0.90408	10.4354	7.9472	4	5	3	3
MG	1-2	4.9	2.95	4.08333	14.0625	1.88016	1.15758	2.20951	6.58627	5	5	3	4
MM	1-2	4.85	6.36667	11.3333	12.4375	2.24666	3.20694	0.440959	4.64845	5	5	3	4
MOp	11-15	3.24286	0.697917	21.5754	23.4345	1.53269	0.295502	4.25202	4.64605	5	4	3	4
MOs	11-15	6.20714	2.0744	27.6468	28.3542	2.42534	0.596653	7.24665	4.67481	5	4	3	4
MRN	2-5	6.35	3.33333	16.75	18.8125	2.41428	1.29288	4.7697	4.36621	5	5	3	4
MS	1-3	1.76667	1.01667	5.5	6.125	0.506486	0.353946	3.51188	4.15143	5	5	3	4
NDB	3-5	1.93333	0.75	6.75	5.09375	0.517674	0.178244	1.53734	1.52851	5	5	3	4
NLOT	2-3	2.2	0.8125	14.25	10.8125	0.676156	0.295363	3.39424	1.38208	5	4	3	4
ORBl	1-2	1.9	0.5	26.6667	11.5	0.718505	0.306186	13.773	3.56341	5	5	3	4
ORBm	1-2	8.3	6.9	32.8333	40.5	2.56588	2.11778	0.833333	6.95596	5	5	3	4
ORBvl	1-2	8.15	1.775	38.8333	28	3.23033	0.565133	9.61047	8.36349	5	5	3	4
OT	6-8	3.33889	1.01111	12.0185	9.50694	1.95018	0.152297	2.78085	0.799979	5	5	3	4
PA	1-2	2.6	0.766667	5.75	9.78125	2.04725	0.254678	2.0052	3.57012	5	5	3	4
PAA	2-4	2.6875	1.6	10.125	14.2083	0.788095	0.235186	4.07034	2.67544	4	5	3	3
PAG	2-5	8.325	8.68333	20.5	39.0156	2.39322	2.49714	1.31696	10.8397	5	5	3	4
PERI	5-9	2.40625	1.52083	7.97917	11.9097	0.636611	0.72298	3.42067	3.06447	4	5	3	3
PH	1-3	18.625	8.95	78.4444	95	4.48899	3.74032	19.3305	24.2414	4	5	3	3
PIR	13-17	31.8516	12.2578	97.8264	85.0521	8.43433	2.69712	21.1411	5.96742	4	4	3	3
PL	2-5	12.7667	7.4125	41	61.375	3.3152	2.2967	5.01612	10.5201	5	5	3	4
PO	2-4	0	0	0.888889	0.333333	0	0	0.341339	0.150231	4	5	3	3
PTLp	3-5	11.0625	19.5083	62.625	52.625	4.13525	9.51839	21.6396	20.7934	4	5	3	4
PVH	2-5	1.43333	0.5625	13.5417	10.3958	0.525991	0.165359	7.01202	3.55323	5	4	3	4
PVT	3-6	12.0764	8.23333	21.3889	27.0093	2.9398	1.29083	6.50575	5.66851	4	5	3	3
RE	2-4	3.43333	1.975	9.91667	12.7917	1.03494	0.514478	2.93092	4.90686	5	5	3	4
RL	1-2	0.35	0.4	1.25	1.25	0.35	0.340955	0.433013	0.433013	5	5	3	4
RN	1-2	0.3	0.05	0.25	0.0625	0.3	0.05	0.144338	0.0625	5	5	3	4
RSPd	2-5	2.125	0.391667	5.47917	5.20833	0.992157	0.119751	1.91836	1.2297	4	5	3	3
RSPv	2-5	1.34375	0.475	7.66667	8	0.65227	0.291548	4.01581	2.03613	4	5	3	3
RT	3-6	2.65972	1.08333	1.38889	2.46296	1.34927	0.602656	0.491439	0.716202	4	5	3	3
SBPV	1-2	2.75	3.1	31.8333	18.5	0.447214	1.01735	7.12585	2.30036	5	5	3	4
SC	1-2	26.9	24.25	49.1667	95.4375	9.73576	6.44835	12.8666	25.3287	5	5	3	4
SGN	1-2	0.85	0.6	1.41667	2.6875	0.31225	0.23184	0.740683	1.39708	5	5	3	4
SH	1-2	0.55	0.05	2.66667	2.625	0.278388	0.05	0.726483	1.43433	5	5	3	4
SI	8-13	1.21389	0.550347	5.15278	5.52431	0.265078	0.093315	0.657978	0.668842	5	4	3	4
SMT	1-2	1.1	0.05	0	1.0625	0.979796	0.05	0	0.679882	5	5	3	4
SN	2-5	0.325	1.05	1.41667	2.375	0.0935414	0.566789	0.220479	0.780625	5	5	3	4
SPF	2-5	1.78125	1.06667	4.79167	13	0.634049	0.265688	1.02147	2.7792	4	5	3	3
SSp-bfd	5-8	2.3375	0.875	15.7708	21.3958	0.726615	0.300824	4.10987	4.29301	5	4	3	4
SSp-ll	3-7	1.54444	0.3125	20.963	31.7431	0.753623	0.137668	3.05186	7.98928	5	4	3	4
SSp-m	2-3	1.06667	0.666667	1.75	1.125	0.482614	0.354534	0.433013	0.725287	5	5	3	4
SSp-n	1-3	1.11667	0.1	0.666667	0.25	0.686982	0.1	0.166667	0.144338	5	5	3	4
SSp-tr	1-2	3.9	1.9	49.6667	55.625	1.53623	0.6255	16.8358	15.2539	5	5	3	4
SSp-ul	5-7	1.31667	0.395833	15.4537	14.5903	0.62408	0.170622	3.06385	3.33448	5	4	3	4
SSs	4-8	2.75417	0.710938	9.86806	10.6042	0.686533	0.215111	3.42617	4.25747	5	5	3	4
STN	1-3	1	0.05	3.69444	4.16667	0.408248	0.05	1.24567	3.16667	4	5	3	3
SUBd	1-2	0.6	0.9	4.83333	8.5	0.203101	0.556776	2.96625	3.31034	5	5	3	4
SUBv	1-3	4.375	6.58333	52.6667	61	1.6755	1.63512	12.6675	17.3445	4	5	3	4
TEa	5-8	6.46875	4.7625	23.5104	23.6042	1.94496	0.961331	6.95564	3.02987	4	5	3	3
TR	2-5	3.1875	2.30417	15.0417	11.3385	1.25468	0.820516	7.73935	0.541692	4	5	3	4
TTd	2-5	6.16667	2.2375	23.5694	27.25	2.15703	0.251868	6.13828	3.67388	5	5	3	4
TTv	1-2	5.65	1.9	14.6667	9.375	2.09702	0.375832	7.0376	3.81404	5	5	3	4
VAL	2-4	0.15	0.125	0.833333	0.635417	0.1	0.0968246	0.708333	0.177083	5	5	3	4
vCA1	2-5	15.5	8.36667	65.2917	84.625	5.89558	1.59259	21.8763	30.0285	4	5	3	4
vCA3	2-5	1.65625	1.175	6.45833	6.85417	0.789539	0.405774	2.37317	1.70082	4	5	3	4
vDG	2-5	4.46875	5.73333	12.1667	16.6875	1.29137	1.5426	1.05656	3.65914	4	5	3	4
VISal	1-3	14.25	12.8	64.75	132.5	6.94172	7.32223	22.8778	16.3872	4	5	3	4
VISC	3-8	2.04444	0.395833	4.02778	3.04167	0.657025	0.160925	1.32356	0.59636	5	4	3	4
VM	2-4	0.59375	1.075	2.08333	10.125	0.267	0.70445	0.982486	5.09135	4	5	3	3
VPL	1-2	0.3	0.15	0.166667	0.375	0.122474	0.1	0.166667	0.375	5	5	3	4
VTA	2-4	2.325	2.31667	12.6667	7.375	0.641775	0.831206	4.32371	1.43795	5	5	3	4
ZI	6-8	6.45312	4.45833	13.3472	16.0069	1.91441	1.05835	0.766253	3.98277	4	5	3	3

## Sheet: Table S2 Statistics
REGION	MAIN EFFECT OF TRAINING	MAIN EFFECT OF SEX	INTERACTION	POSTHOC
				trained male versus trained female
LHA	F(1,11) = 228.80, p < 0.0001	F(1,11) = 0.13, p = 0.7250	F(1,11) = 1.84, p = 0.2023
SI	F(1,12) = 97.36, p < 0.0001	F(1,12) = 0.10, p = 0.7521	F(1,12) = 1.31, p = 0.2742
BMA	F(1,10) = 96.06, p < 0.0001	F(1,10) = 0.92, p = 0.3594	F(1,10) = 3.04, p = 0.1116
BLA	F(1,11) = 80.53, p < 0.0001	F(1,11) = 0.40, p = 0.4958	F(1,11) = 2.82, p = 0.1213
AIp	F(1,12) = 75.38, p < 0.0001	F(1,12) = 0.38, p = 0.5475	F(1,12) = 1.66, p = 0.2219
LA	F(1,11) = 71.28, p < 0.0001	F(1,11) = 2.04, p = 0.1811	F(1,11) = 5.15, p = 0.0443	p = 0.0357
AHN	F(1,13) = 69.70, p < 0.0001	F(1,13) = 1.05, p = 0.3245	F(1,13) = 0.42, p = 0.5282
SBPV	F(1,13) = 66.59, p < 0.0001	F(1,13) = 5.67, p = 0.0332	F(1,13) = 6.30, p = 0.0261	p = 0.0073
COA	F(1,10) = 57.47, p < 0.0001	F(1,10) = 1.40, p = 0.2634	F(1,10) = 6.00, p = 0.0349	p = 0.0375
EP	F(1,10) = 57.43, p < 0.0001	F(1,10) = 0.23, p = 0.6452	F(1,10) = 2.36, p = 0.1556
ORBm	F(1,13) = 55.42, p < 0.0001	F(1,13) = 0.64, p = 0.4367	F(1,13) = 1.35, p = 0.2665
MEA	F(1,11) = 54.92, p < 0.0001	F(1,11) = 0.25, p = 0.6285	F(1,11) = 0.04, p = 0.8377
ACAd	F(1,12) = 51.56, p < 0.0001	F(1,12) = 1.62, p = 0.2274	F(1,12) = 0.00, p = 0.9776
NLOT	F(1,13) = 51.16, p < 0.0001	F(1,13) = 1.42, p = 0.2554	F(1,13) = 1.42, p = 0.2554
PL	F(1,13) = 49.50, p < 0.0001	F(1,13) = 1.65, p = 0.2210	F(1,13) = 4.85, p = 0.0463	p = 0.0413
TTd	F(1,13) = 49.31, p < 0.0001	F(1,13) = 0.00, p = 0.9678	F(1,13) = 1.59, p = 0.2299
CEA	F(1,13) = 48.00, p < 0.0001	F(1,13) = 0.49, p = 0.4964	F(1,13) = 5.20, p = 0.0400	p = 0.0749
MOp	F(1,12) = 47.14, p < 0.0001	F(1,12) = 0.01, p = 0.9106	F(1,12) = 0.54, p = 0.4757
SSp-ul	F(1,12) = 47.10 p < 0.0001	F(1,12) = 0.19, p = 0.6732	F(1,12) = 0.00, p = 0.9891
AIv	F(1,13) = 44.30, p < 0.0001	F(1,13) = 5.18, p = 0.0405	F(1,13) = 0.66, p = 0.4310
PIR	F(1,10) = 43.03, p < 0.0001	F(1,10) = 2.34, p = 0.1570	F(1,10) = 0.10, p = 0.7538
LSr	F(1,13) = 42.68, p < 0.0001	F(1,13) = 1.12, p = 0.3095	F(1,13) = 0.23, p = 0.6396
VISal	F(1,12) = 41.98, p < 0.0001	F(1,12) = 6.37, p = 0.0267	F(1,12) = 6.94, p = 0.0218	p = 0.0223
SSp-bfd	F(1,12) = 40.07, p < 0.0001	F(1,12) = 0.60, p = 0.4528	F(1,12) = 1.75, p = 0.2110
ACAv	F(1,12) = 39.26, p < 0.0001	F(1,12) = 0.04, p = 0.8438	F(1,12) = 1.64, p = 0.2247
ACB	F(1,13) = 39.01, p < 0.0001	F(1,13) = 1.97, p = 0.1834	F(1,13) = 0.23, p = 0.6410
ILA	F(1,13) = 38.83, p < 0.0001	F(1,13) = 2.34, p = 0.1504	F(1,13) = 0.46, p = 0.5094
BSTal	F(1,13) = 38.68, p < 0.0001	F(1,13) = 2.22, p = 0.1603	F(1,13) = 0.00, p = 0.9647
CLA	F(1,12) = 38.30, p < 0.0001	F(1,12) = 8.46, p = 0.0131	F(1,12) = 0.93, p = 0.3550
MOs	F(1,12) = 37.82, p < 0.0001	F(1,12) = 0.19, p = 0.6667	F(1,12) = 0.39, p = 0.5445
AON	F(1,13) = 37.68, p < 0.0001	F(1,13) = 0.83, p = 0.3785	F(1,13) = 0.23, p = 0.6430
SPF	F(1,11) = 37.39, p < 0.0001	F(1,11) = 9.40, p = 0.0107	F(1,11) = 13.33, p = 0.0038	p = 0.0012
SSp-ll	F(1,12) = 36.03, p < 0.0001	F(1,12) = 1.27, p = 0.2817	F(1,12) = 2.01, p = 0.1817
DP	F(1,13) = 34.49, p < 0.0001	F(1,13) = 2.34, p = 0.1500	F(1,13) = 5.27, p = 0.0390	p = 0.0274
PH	F(1,11) = 33.33, p = 0.0001	F(1,11) = 0.07, p = 0.7904	F(1,11) = 1.08, p = 0.3215
TEa	F(1,11) = 30.99, p = 0.0002	F(1,11) = 0.06, p = 0.8071	F(1,11) = 0.08, p = 0.7852
OT	F(1,13) = 29.86, p = 0.0001	F(1,13) = 2.37, p = 0.1476	F(1,13) = 0.00, p = 0.9543
SSp-tr	F(1,13) = 28.77, p = 0.0001	F(1,13) = 0.05, p = 0.8343	F(1,13) = 0.18, p = 0.6749
ORBvl	F(1,13) = 26.62, p = 0.0002	F(1,13) = 2.43, p = 0.1428	F(1,13) = 1.63, p = 0.6927
SUBv	F(1,12) = 26.29, p = 0.0003	F(1,12) = 0.28, p = 0.6083	F(1,12) = 0.09, p = 0.7650
PAA	F(1,11) = 26.23, p = 0.0003	F(1,11) = 0.59, p = 0.4601	F(1,11) = 1.75, p = 0.2133
ECT	F(1,11) = 24.27, p = 0.0005	F(1,11) = 0.07, p = 0.7958	F(1,11) = 1.03, p = 0.3314
NDB	F(1,13) = 23.01, p = 0.0003	F(1,13) = 2.21, p = 0.1609	F(1,13) = 0.06, p = 0.8083
LSv	F(1,13) = 20.68, p = 0.0005	F(1,13) = 0.81, p = 0.3840	F(1,13) = 1.70, p = 0.2152
ZI	F(1,11) = 20.30, p = 0.0009	F(1,11) = 0.03, p = 0.8739	F(1,11) = 1.29, p = 0.2797
VTA	F(1,13) = 19.71, p = 0.0007	F(1,13) = 2.34 p = 0.1504	F(1,13) = 2.32, p = 0.1516
AUDp	F(1,11) = 18.78, p = 0.0012	F(1,11) = 0.14, p = 0.7196	F(1,11) = 0.61, p = 0.9434
PERI	F(1,11) = 17.69, p = 0.0015	F(1,11) = 0.64, p = 0.4393	F(1,11) = 1.61, p = 0.2306
PO	F(1,11) = 17.63, p = 0.0015	F(1,11) = 3.64, p = 0.0827	F(1,11) = 3.64, p = 0.0827
AId	F(1,13) = 17.57, p = 0.0011	F(1,13) = 2.01, p = 0.1803	F(1,13) = 0.03, p = 0.8645
AUDv	F(1,11) = 17.36, p = 0.0016	F(1,11) = 0.05, p = 0.8336	F(1,11) = 0.02, p = 0.8981
vDG	F(1,12) = 17.19, p = 0.0014	F(1,12) = 1.65, p = 0.2226	F(1,12) = 0.52, p = 0.4830
MRN	F(1,13) = 17.18, p = 0.0012	F(1,13) = 0.02, p = 0.8809	F(1,13) = 0.66, p = 0.4305
AAA	F(1,12) = 16.14, p = 0.0017	F(1,12) = 0.64, p = 0.4400	F(1,12) = 0.46, p = 0.5114
vCA3	F(1,12) = 16.09, p = 0.0017	F(1,12) = 0.00, p = 0.9745	F(1,12) = 0.11, p = 0.7429
RSPd	F(1,11) = 15.20, p = 0.0025	F(1,11) = 0.91, p = 0.3594	F(1,11) = 0.49, p = 0.4997
BSTam	F(1,13) = 15.19, p = 0.0018	F(1,13) = 0.39, p = 0.5409	F(1,13) = 1.00, p = 0.3365
RSPv	F(1,11) = 14.71, p = 0.0028	F(1,11) = 0.02, p = 0.8848	F(1,11) = 0.11, p = 0.7455
DMH	F(1,13) = 14.53, p = 0.0022	F(1,13) = 0.12, p = 0.7341	F(1,13) = 0.22, p = 0.6483
PAG	F(1,13) = 14.39, p = 0.0022	F(1,13) = 2.84, p = 0.1159	F(1,13) = 2.63, p = 0.1291
AUDd	F(1,11) = 14.10, p = 0.0032	F(1,11) = 0.92, p = 0.3593	F(1,11) = 1.27 p = 0.2844
PVT	F(1,11) = 13.31 p = 0.0038	F(1,11) = 0.05, p = 0.8217	F(1,11) = 1.51, p = 0.2446
GU	F(1,13) = 13.19, p = 0.0030	F(1,13) = 3.56, p = 0.0818	F(1,13) = 0.00, p = 0.9802
vCA1	F(1,12) = 13.03, p = 0.0036	F(1,12) = 0.12, p = 0.7329	F(1,12) = 0.57, p = 0.4631
ORBl	F(1,13) = 12.98, p = 0.0032	F(1,13) = 2.79, p = 0.1190	F(1,13) = 1.92, p = 0.1888
TR	F(1,12) = 12.82, p = 0.0038	F(1,12) = 0.62, p = 0.4470	F(1,12) = 0.23, p = 0.6376
PVH	F(1,12) = 12.36, p = 0.0043	F(1,12) = 0.41, p = 0.5320	F(1,12) = 0.13, p = 0.7218
ENTl	F(1,11) = 12.01, p = 0.0053	F(1,11) = 0.37, p = 0.5555	F(1,11) = 0.22, p = 0.6472
BSTov	F(1,13) = 11.45, p = 0.0049	F(1,13) = 0.05, p = 0.8290	F(1,13) = 0.03, p = 0.8637
SSs	F(1,12) = 11.27, p = 0.0057	F(1,12) = 0.07, p = 0.8008	F(1,12) = 0.30, p = 0.5933
RE	F(1,13) = 10.78, p = 0.0059	F(1,13) = 0.07, p = 0.7923	F(1,13) = 0.68, p = 0.4258
VISC	F(1,12) = 10.49, p = 0.0071	F(1,12) = 3.40, p = 0.0901	F(1,12) = 0.21, p = 0.6513
CP	F(1,10) = 10.37, p = 0.0092	F(1,10) = 0.05 p = 0.8333	F(1,10) = 0.90, p = 0.3646
SC	F(1,13) = 10.11, p = 0.0072	F(1,13) = 2.20, p = 0.1616	F(1,13) = 2.77, p = 0.1199
PTLp	F(1,13) = 9.79, p = 0.0080	F(1,13) = 0.00, p = 0.9969	F(1,13) = 0.53, p = 0.4792
SH	F(1,13) = 9.88, p = 0.0078	F(1,13) = 0.13, p = 0.7225	F(1,13) = 0.09, p = 0.7637
SUBd	F(1,13) = 9.68, p = 0.0083	F(1,13) = 1.09, p = 0.3161	F(1,13) = 0.78, p = 0.3922
IMD	F(1,11) = 9.08, p = 0.0118	F(1,11) = 0.11, p = 0.7421	F(1,11) = 0.21, p = 0.6568
LSc	F(1,13) = 8.98, p = 0.0103	F(1,13) = 0.38, p = 0.5492	F(1,13) = 1.94, p = 0.1875
AV	F(1,13) = 8.29, p = 0.0129	F(1,13) = 1.84, p = 0.1981	F(1,13) = 1.90, p = 0.1915
PA	F(1,13) = 7.46, p = 0.0171	F(1,13) = 0.24, p = 0.6299	F(1,13) = 1.73, p = 0.2106
dCA1	F(1,11) = 6.71, p = 0.0252	F(1,11) = 0.37, p = 0.5550	F(1,11) = 1.55, p = 0.2384
LG	F(1,11) = 6.58, p = 0.0263	F(1,11) = 2.20, p = 0.1660	F(1,11) = 2.81, p = 0.1218
dCA3	F(1,11) = 6.47, p = 0.0273	F(1,11) = 0.02, p = 0.9040	F(1,11) = 1.19, p = 0.2990
LP	F(1,11) = 6.42, p = 0.0278	F(1,11) = 3.81, p = 0.0770	F(1,11) = 2.22, p = 0.1641
STN	F(1,11) = 6.39, p = 0.0281	F(1,11) = 0.03, p = 0.8625	F(1,11) = 0.28, p = 0.6081
TTv	F(1,13) = 6.39, p = 0.0252	F(1,13) = 1.92, p = 0.1890	F(1,13) = 0.06, p = 0.8168
VM	F(1,11) = 6.36, p = 0.0284	F(1,11) = 4.16, p = 0.0662	F(1,11) = 3.27, p = 0.0979
MM	F(1,13) = 5.66, p = 0.0334	F(1,13) = 0.03, p = 0.8548	F(1,13) = 0.03, p = 0.8548
SN	F(1,13) = 5.44, p = 0.0365	F(1,13) = 2.64, p = 0.1284	F(1,13) = 0.05, p = 0.8254
VAL	F(1,13) = 4.99, p = 0.0437	F(1,13) = 0.17, p = 0.6833	F(1,13) = 0.10, p = 0.7514
RL	F(1,13) = 4.97, p = 0.0441	F(1,13) = 0.00, p = 0.9502	F(1,13) = 0.00, p = 0.9502
MA	F(1,13) = 4.90, p = 0.0454	F(1,13) = 0.67, p = 0.4292	F(1,13) = 0.81, p = 0.3844
GP	F(1,12) = 4.61, p = 0.0528	F(1,12) = 1.61, p = 0.2289	F(1,12) = 3.88, p = 0.0723
AM	F(1,13) = 4.56, p = 0.0523	F(1,13) = 0.20, p = 0.6609	F(1,13) = 0.62, p = 0.4457
MS	F(1,13) = 3.58, p = 0.0809	F(1,13) = 0.00, p = 0.9791	F(1,13) = 0.09, p = 0.7731
SGN	F(1,13) = 3.13, p = 0.1002	F(1,13) = 0.46, p = 0.5080	F(1,13) = 1.03, p = 0.3291
dDG	F(1,11) = 3.02, p = 0.1100	F(1,11) = 0.51, p = 0.4880	F(1,11) = 1.47, p = 0.2516
dCA2	F(1,11) = 2.89, p = 0.1170	F(1,11) = 0.20, p = 0.6618	F(1,11) = 0.12, p = 0.7375
LD	F(1,13) = 2.80, p = 0.1180	F(1,13) = 0.19, p = 0.6695	F(1,13) = 0.00, p = 0.9431
MG	F(1,13) = 2.17, p = 0.1650	F(1,13) = 1.32, p = 0.2719	F(1,13) = 2.91, p = 0.1120
SSp-m	F(1,13) = 1.18, p = 0.2972	F(1,13) = 0.95, p = 0.3473	F(1,13) = 0.05, p = 0.8338
IPN	F(1,13) = 1.16, p = 0.3006	F(1,13) = 1.37, p = 0.2623	F(1,13) = 3.15, p = 0.0994
AD	F(1,12) = 1.16, p = 0.3029	F(1,12) = 0.02, p = 0.8895	F(1,12) = 4.30, p = 0.0603
CL	F(1,13) = 1.12, p = 0.3101	F(1,13) = 0.12, p = 0.7382	F(1,13) = 2.21, p = 0.1613
APN	F(1,13) = 0.61, p = 0.4505	F(1,13) = 1.98, p = 0.1810	F(1,13) = 3.59, p = 0.0806
EW	F(1,13) = 0.58, p = 0.4611	F(1,13) = 0.73, p = 0.4088	F(1,13) = 0.31, p = 0.5877
SSp-n	F(1,13) = 0.12, p = 0.7364	F(1,13) = 2.70, p = 0.1242	F(1,13) = 0.47, p = 0.5036
VPL	F(1,13) = 0.05, p = 0.8314	F(1,13) = 0.02, p = 0.8922	F(1,13) = 0.72, p = 0.4112
RN	F(1,13) = 0.01, p = 0.9251	F(1,13) = 1.25, p = 0.2835	F(1,13) = 0.03, p = 0.8755
SMT	F(1,13) = 0.00, p = 0.9500	F(1,13) = 0.00, p = 0.9929	F(1,13) = 2.38, p = 0.1469
RT	F(1,11) = 0.00, p = 0.9541	F(1,11) = 0.07, p = 0.7908	F(1,11) = 2.06, p = 0.1793
